# Supplementary material for: Balancing stability and Li-ion conductivity of Li10SiP2O12 for solid-state electrolytes with the assistance of a body-centered cubic oxygen framework
Source: Royal Society of Chemistry journal article supplement (doi:10.1039/d1ta06338c), 2021-01-01
Supplement: d1ta06338c1.pdf [file d1ta06338c1.pdf]

## Supporting Information for

# Balancing Stability and Li-ion Conductivity of $\text{Li}_{10}\text{SiP}_2\text{O}_{12}$ for Solid-State Electrolytes with Assistance of Body-Centered Cubic Oxygen Framework

*Bingkai Zhang,<sup>1</sup> Zhiwei He,<sup>1</sup> Jiajie Zhong,<sup>1</sup> Luyi Yang,<sup>2</sup> Zhan Lin,<sup>1,\*</sup> Feng Pan<sup>2,\*</sup>*

<sup>1</sup>Guangzhou Key Laboratory of Clean Transportation Energy Chemistry, School of Chemical Engineering and Light Industry, Guangdong University of Technology, Guangzhou 510006, China.

<sup>2</sup>School of Advanced Materials, Peking University Shenzhen Graduate School, Shenzhen 518055, China.

\*Corresponding author: [zhanlin@gdut.edu.cn](mailto:zhanlin@gdut.edu.cn); [panfeng@pku.edu.cn](mailto:panfeng@pku.edu.cn)

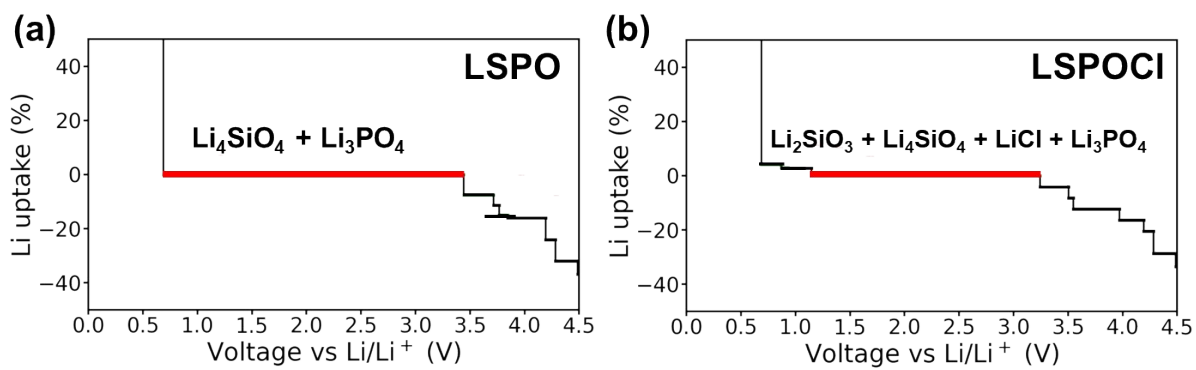

**Fig. S1.** (a) and (b) The plots of Li uptake per formula unit (f.u.) of LSPO and LSPOCl against voltage vs Li/Li<sup>+</sup>, respectively.

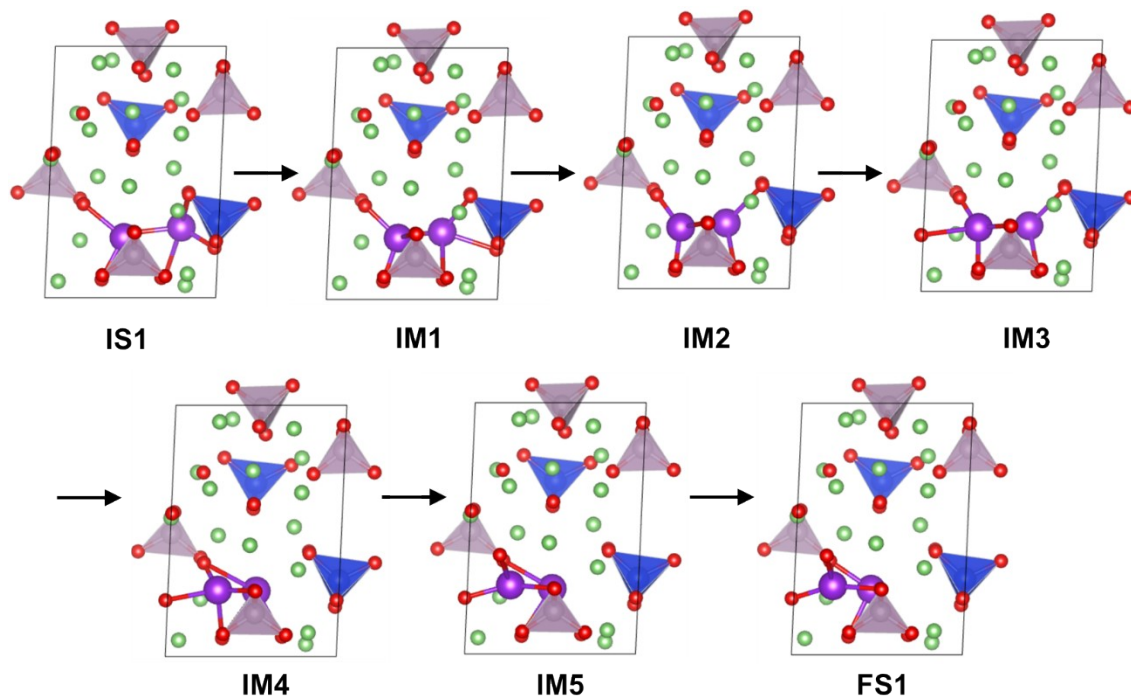

**Fig. S2.** The configurations of Li-ions cooperative migration along  $ab$ -plane in LPSO. The purple spheres represent the migrant Li-ions along the  $ab$ -plane in LPSO. Here, IS1, IM1, IM2, IM3, IM4, IM5, and FS1 correspond to the energy point listed in Figure 4d.

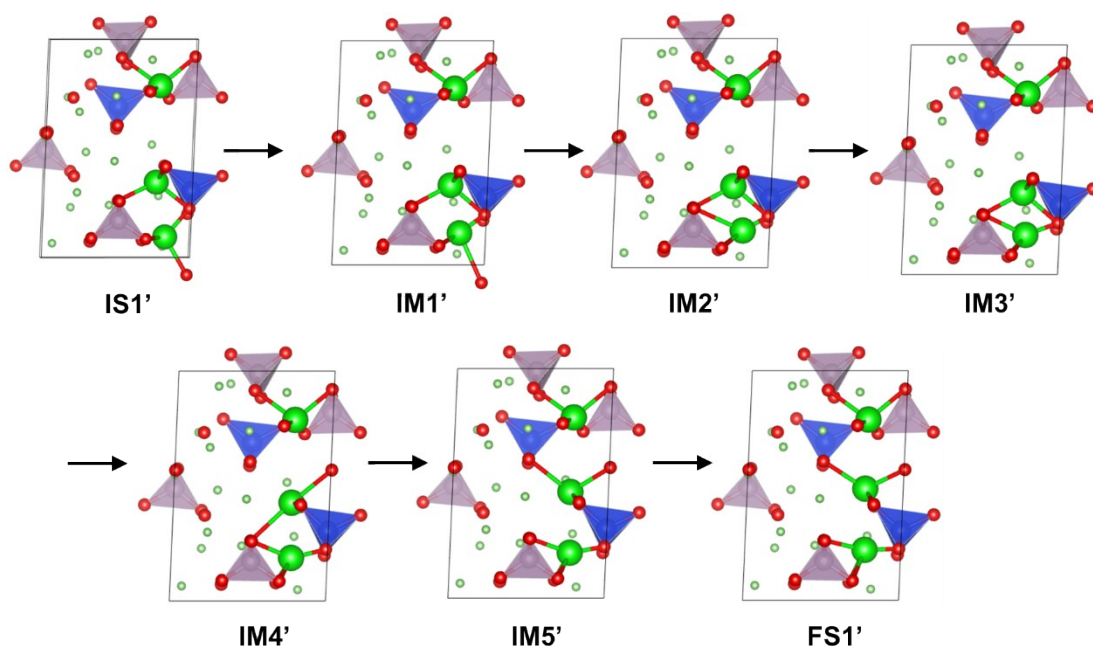

**Fig. S3.** The configurations of Li-ions cooperative migration along the  $c$ -axis in LPSO. The purple

spheres represent the migrant Li-ions along the  $c$ -axis in LPSO. Here, IS1', IM1', IM2', IM3', IM4', IM5', and FS1' corresponds to the energy point listed in Figure 4d.
